# Supplementary material for: MIROC6 Large Ensemble (MIROC6-LE): experimental design and initial analyses
Source: Copernicus journal article supplement (doi:10.5194/esd-2023-12), 2023-04-25
Supplement: Supplementary file 1 [file Supplementary_Data_S1.xlsx]

## Sheet: change_ENSO_DJF_nens-a
Column1	Column2	Column3	Column4	Column5	Column6	Column7	Column8	Column9	Column10	Column11	Column12	Column13	Column14
	piControl	historical	ssp119	ssp126	ssp245	ssp370	ssp585	hist-GHG	hist-aer	hist-nat	ssp245-GHG	ssp245-aer	ssp245-nat
piControl		3 (+)	2 (+)	2 (+)	1 (+)	1 (+)	1 (+)	7 (+)	23 (+)	-	2 (+)	-	-
historical	3 (-)		33 (+)	20 (+)	4 (+)	3 (+)	4 (+)	22 (-)	6 (-)	3 (-)	8 (+)	3 (-)	3 (-)
ssp119	2 (-)	33 (-)		-	12 (+)	6 (+)	10 (+)	7 (-)	2 (-)	2 (-)	38 (+)	2 (-)	2 (-)
ssp126	2 (-)	20 (-)	-		15 (+)	7 (+)	13 (+)	5 (-)	2 (-)	2 (-)	-	2 (-)	2 (-)
ssp245	1 (-)	4 (-)	12 (-)	15 (-)		46 (+)	-	2 (-)	1 (-)	1 (-)	37 (-)	1 (-)	1 (-)
ssp370	1 (-)	3 (-)	6 (-)	7 (-)	46 (-)		-	2 (-)	1 (-)	1 (-)	9 (-)	1 (-)	1 (-)
ssp585	1 (-)	4 (-)	10 (-)	13 (-)	-	-		2 (-)	1 (-)	1 (-)	24 (-)	1 (-)	1 (-)
hist-GHG	7 (-)	22 (+)	7 (+)	5 (+)	2 (+)	2 (+)	2 (+)		20 (-)	5 (-)	3 (+)	7 (-)	6 (-)
hist-aer	23 (-)	6 (+)	2 (+)	2 (+)	1 (+)	1 (+)	1 (+)	20 (+)		14 (-)	2 (+)	23 (-)	20 (-)
hist-nat	-	3 (+)	2 (+)	2 (+)	1 (+)	1 (+)	1 (+)	5 (+)	14 (+)		1 (+)	-	-
ssp245-GHG	2 (-)	8 (-)	38 (-)	-	37 (+)	9 (+)	24 (+)	3 (-)	2 (-)	1 (-)		1 (-)	1 (-)
ssp245-aer	-	3 (+)	2 (+)	2 (+)	1 (+)	1 (+)	1 (+)	7 (+)	23 (+)	-	1 (+)		-
ssp245-nat	-	3 (+)	2 (+)	2 (+)	1 (+)	1 (+)	1 (+)	6 (+)	20 (+)	-	1 (+)	-

## Sheet: change_ENSO_DJF_nens-i
Column1	Column2	Column3	Column4	Column5	Column6	Column7	Column8	Column9	Column10	Column11	Column12	Column13	Column14
	piControl	historical	ssp119	ssp126	ssp245	ssp370	ssp585	hist-GHG	hist-aer	hist-nat	ssp245-GHG	ssp245-aer	ssp245-nat
piControl		5 (+)	4 (+)	3 (+)	3 (+)	3 (+)	3 (+)	8 (+)	27 (+)	-	3 (+)	-	-
historical	5 (-)		31 (+)	19 (+)	7 (+)	6 (+)	8 (+)	24 (-)	7 (-)	4 (-)	11 (+)	4 (-)	4 (-)
ssp119	4 (-)	31 (-)		-	15 (+)	9 (+)	13 (+)	9 (-)	5 (-)	3 (-)	46 (+)	3 (-)	4 (-)
ssp126	3 (-)	19 (-)	-		19 (+)	12 (+)	19 (+)	7 (-)	4 (-)	3 (-)	-	3 (-)	3 (-)
ssp245	3 (-)	7 (-)	15 (-)	19 (-)		-	-	5 (-)	3 (-)	3 (-)	44 (-)	3 (-)	3 (-)
ssp370	3 (-)	6 (-)	9 (-)	12 (-)	-		-	4 (-)	3 (-)	3 (-)	15 (-)	3 (-)	3 (-)
ssp585	3 (-)	8 (-)	13 (-)	19 (-)	-	-		5 (-)	3 (-)	3 (-)	36 (-)	3 (-)	3 (-)
hist-GHG	8 (-)	24 (+)	9 (+)	7 (+)	5 (+)	4 (+)	5 (+)		21 (-)	7 (-)	7 (+)	7 (-)	7 (-)
hist-aer	27 (-)	7 (+)	5 (+)	4 (+)	3 (+)	3 (+)	3 (+)	21 (+)		16 (-)	4 (+)	24 (-)	23 (-)
hist-nat	-	4 (+)	3 (+)	3 (+)	3 (+)	3 (+)	3 (+)	7 (+)	16 (+)		3 (+)	-	-
ssp245-GHG	3 (-)	11 (-)	46 (-)	-	44 (+)	15 (+)	36 (+)	7 (-)	4 (-)	3 (-)		3 (-)	3 (-)
ssp245-aer	-	4 (+)	3 (+)	3 (+)	3 (+)	3 (+)	3 (+)	7 (+)	24 (+)	-	3 (+)		-
ssp245-nat	-	4 (+)	4 (+)	3 (+)	3 (+)	3 (+)	3 (+)	7 (+)	23 (+)	-	3 (+)	-

## Sheet: change_global T2_ANN_nens-a
Column1	Column2	Column3	Column4	Column5	Column6	Column7	Column8	Column9	Column10	Column11	Column12	Column13	Column14
	piControl	historical	ssp119	ssp126	ssp245	ssp370	ssp585	hist-GHG	hist-aer	hist-nat	ssp245-GHG	ssp245-aer	ssp245-nat
piControl		3 (+)	2 (+)	2 (+)	1 (+)	1 (+)	1 (+)	8 (+)	-	-	2 (+)	-	-
historical	3 (-)		-	-	9 (+)	6 (+)	7 (+)	18 (-)	3 (-)	4 (-)	35 (+)	3 (-)	3 (-)
ssp119	2 (-)	-		-	22 (+)	13 (+)	17 (+)	8 (-)	2 (-)	2 (-)	-	2 (-)	2 (-)
ssp126	2 (-)	-	-		19 (+)	10 (+)	13 (+)	8 (-)	2 (-)	2 (-)	-	2 (-)	2 (-)
ssp245	1 (-)	9 (-)	22 (-)	19 (-)		-	-	3 (-)	1 (-)	1 (-)	27 (-)	1 (-)	1 (-)
ssp370	1 (-)	6 (-)	13 (-)	10 (-)	-		-	2 (-)	1 (-)	1 (-)	12 (-)	1 (-)	1 (-)
ssp585	1 (-)	7 (-)	17 (-)	13 (-)	-	-		3 (-)	1 (-)	1 (-)	17 (-)	1 (-)	1 (-)
hist-GHG	8 (-)	18 (+)	8 (+)	8 (+)	3 (+)	2 (+)	3 (+)		9 (-)	11 (-)	5 (+)	4 (-)	7 (-)
hist-aer	-	3 (+)	2 (+)	2 (+)	1 (+)	1 (+)	1 (+)	9 (+)		-	2 (+)	36 (-)	-
hist-nat	-	4 (+)	2 (+)	2 (+)	1 (+)	1 (+)	1 (+)	11 (+)	-		2 (+)	23 (-)	-
ssp245-GHG	2 (-)	35 (-)	-	-	27 (+)	12 (+)	17 (+)	5 (-)	2 (-)	2 (-)		1 (-)	2 (-)
ssp245-aer	-	3 (+)	2 (+)	2 (+)	1 (+)	1 (+)	1 (+)	4 (+)	36 (+)	23 (+)	1 (+)		-
ssp245-nat	-	3 (+)	2 (+)	2 (+)	1 (+)	1 (+)	1 (+)	7 (+)	-	-	2 (+)	-

## Sheet: change_global T2_ANN_nens-i
Column1	Column2	Column3	Column4	Column5	Column6	Column7	Column8	Column9	Column10	Column11	Column12	Column13	Column14
	piControl	historical	ssp119	ssp126	ssp245	ssp370	ssp585	hist-GHG	hist-aer	hist-nat	ssp245-GHG	ssp245-aer	ssp245-nat
piControl		6 (+)	4 (+)	4 (+)	3 (+)	3 (+)	3 (+)	10 (+)	-	-	4 (+)	-	-
historical	6 (-)		23 (+)	23 (+)	8 (+)	7 (+)	8 (+)	-	6 (-)	5 (-)	15 (+)	4 (-)	5 (-)
ssp119	4 (-)	23 (-)		-	26 (+)	15 (+)	23 (+)	12 (-)	4 (-)	4 (-)	-	4 (-)	4 (-)
ssp126	4 (-)	23 (-)	-		25 (+)	16 (+)	21 (+)	12 (-)	4 (-)	4 (-)	-	3 (-)	4 (-)
ssp245	3 (-)	8 (-)	26 (-)	25 (-)		-	-	7 (-)	3 (-)	3 (-)	38 (-)	3 (-)	4 (-)
ssp370	3 (-)	7 (-)	15 (-)	16 (-)	-		-	6 (-)	3 (-)	3 (-)	20 (-)	3 (-)	3 (-)
ssp585	3 (-)	8 (-)	23 (-)	21 (-)	-	-		6 (-)	3 (-)	3 (-)	32 (-)	3 (-)	3 (-)
hist-GHG	10 (-)	-	12 (+)	12 (+)	7 (+)	6 (+)	6 (+)		10 (-)	7 (-)	9 (+)	6 (-)	9 (-)
hist-aer	-	6 (+)	4 (+)	4 (+)	3 (+)	3 (+)	3 (+)	10 (+)		-	4 (+)	39 (-)	-
hist-nat	-	5 (+)	4 (+)	4 (+)	3 (+)	3 (+)	3 (+)	7 (+)	-		3 (+)	-	-
ssp245-GHG	4 (-)	15 (-)	-	-	38 (+)	20 (+)	32 (+)	9 (-)	4 (-)	3 (-)		3 (-)	4 (-)
ssp245-aer	-	4 (+)	4 (+)	3 (+)	3 (+)	3 (+)	3 (+)	6 (+)	39 (+)	-	3 (+)		-
ssp245-nat	-	5 (+)	4 (+)	4 (+)	4 (+)	3 (+)	3 (+)	9 (+)	-	-	4 (+)	-

## Sheet: change_global P_ANN_nens-a
Column1	Column2	Column3	Column4	Column5	Column6	Column7	Column8	Column9	Column10	Column11	Column12	Column13	Column14
	piControl	historical	ssp119	ssp126	ssp245	ssp370	ssp585	hist-GHG	hist-aer	hist-nat	ssp245-GHG	ssp245-aer	ssp245-nat
piControl		4 (+)	3 (+)	3 (+)	2 (+)	1 (+)	1 (+)	7 (+)	-	-	3 (+)	-	-
historical	4 (-)		-	-	32 (+)	10 (+)	7 (+)	19 (-)	5 (-)	5 (-)	-	4 (-)	4 (-)
ssp119	3 (-)	-		-	28 (+)	10 (+)	7 (+)	19 (-)	5 (-)	5 (-)	-	3 (-)	3 (-)
ssp126	3 (-)	-	-		-	14 (+)	8 (+)	15 (-)	4 (-)	5 (-)	-	3 (-)	3 (-)
ssp245	2 (-)	32 (-)	28 (-)	-		48 (+)	27 (+)	6 (-)	3 (-)	3 (-)	-	2 (-)	2 (-)
ssp370	1 (-)	10 (-)	10 (-)	14 (-)	48 (-)		-	4 (-)	2 (-)	2 (-)	14 (-)	2 (-)	2 (-)
ssp585	1 (-)	7 (-)	7 (-)	8 (-)	27 (-)	-		3 (-)	2 (-)	1 (-)	9 (-)	2 (-)	1 (-)
hist-GHG	7 (-)	19 (+)	19 (+)	15 (+)	6 (+)	4 (+)	3 (+)		15 (-)	12 (-)	9 (+)	7 (-)	8 (-)
hist-aer	-	5 (+)	5 (+)	4 (+)	3 (+)	2 (+)	2 (+)	15 (+)		-	3 (+)	-	-
hist-nat	-	5 (+)	5 (+)	5 (+)	3 (+)	2 (+)	1 (+)	12 (+)	-		4 (+)	-	-
ssp245-GHG	3 (-)	-	-	-	-	14 (+)	9 (+)	9 (-)	3 (-)	4 (-)		3 (-)	3 (-)
ssp245-aer	-	4 (+)	3 (+)	3 (+)	2 (+)	2 (+)	2 (+)	7 (+)	-	-	3 (+)		-
ssp245-nat	-	4 (+)	3 (+)	3 (+)	2 (+)	2 (+)	1 (+)	8 (+)	-	-	3 (+)	-

## Sheet: change_global P_ANN_nens-i
Column1	Column2	Column3	Column4	Column5	Column6	Column7	Column8	Column9	Column10	Column11	Column12	Column13	Column14
	piControl	historical	ssp119	ssp126	ssp245	ssp370	ssp585	hist-GHG	hist-aer	hist-nat	ssp245-GHG	ssp245-aer	ssp245-nat
piControl		6 (+)	5 (+)	5 (+)	4 (+)	4 (+)	3 (+)	9 (+)	-	-	4 (+)	-	-
historical	6 (-)		-	-	16 (+)	9 (+)	8 (+)	41 (-)	8 (-)	7 (-)	50 (+)	6 (-)	7 (-)
ssp119	5 (-)	-		-	31 (+)	13 (+)	10 (+)	23 (-)	7 (-)	6 (-)	-	5 (-)	5 (-)
ssp126	5 (-)	-	-		50 (+)	16 (+)	13 (+)	18 (-)	5 (-)	5 (-)	-	5 (-)	5 (-)
ssp245	4 (-)	16 (-)	31 (-)	50 (-)		47 (+)	33 (+)	8 (-)	4 (-)	4 (-)	-	4 (-)	4 (-)
ssp370	4 (-)	9 (-)	13 (-)	16 (-)	47 (-)		-	6 (-)	4 (-)	4 (-)	19 (-)	4 (-)	4 (-)
ssp585	3 (-)	8 (-)	10 (-)	13 (-)	33 (-)	-		6 (-)	4 (-)	4 (-)	16 (-)	3 (-)	3 (-)
hist-GHG	9 (-)	41 (+)	23 (+)	18 (+)	8 (+)	6 (+)	6 (+)		16 (-)	10 (-)	14 (+)	10 (-)	10 (-)
hist-aer	-	8 (+)	7 (+)	5 (+)	4 (+)	4 (+)	4 (+)	16 (+)		-	5 (+)	-	-
hist-nat	-	7 (+)	6 (+)	5 (+)	4 (+)	4 (+)	4 (+)	10 (+)	-		5 (+)	-	-
ssp245-GHG	4 (-)	50 (-)	-	-	-	19 (+)	16 (+)	14 (-)	5 (-)	5 (-)		4 (-)	5 (-)
ssp245-aer	-	6 (+)	5 (+)	5 (+)	4 (+)	4 (+)	3 (+)	10 (+)	-	-	4 (+)		-
ssp245-nat	-	7 (+)	5 (+)	5 (+)	4 (+)	4 (+)	3 (+)	10 (+)	-	-	5 (+)	-
